# Supplementary material
Source: PubMed Central journal article supplement (PMC3848249)
Supplement: NIHMS495779-supplement-2.pdf [file NIHMS495779-supplement-2.pdf]

**Supplementary Table 1. Accuracy of targeted addition for *XIST* transgene on Chr21 in Down syndrome iPSCs**

| Ratio of <i>XIST</i> to Puro | <i>XIST</i> + clones (Puro+) | Random integration | Targeted integration | Single target | Double target | Triple target |
|------------------------------|------------------------------|--------------------|----------------------|---------------|---------------|---------------|
| 3:1                          | 65                           | 1 (1.5%)           | 64 (98.5%)           | 57 (87.7%)    | 7 (10.8%)     | 0 (0.0%)      |
| 5:1                          | 16                           | 1 (6.3%)           | 15 (93.8%)           | 8 (50.0%)     | 5 (31.3%)     | 2 (12.5%)     |

**Supplementary Table 1.** Changes in the ratio of selectable marker to *XIST* transgene produce conditions where multiple targeted integrations of *XIST* are seen more frequently. Random integrations may be over-estimated, as much searching was required to find them.

**Supplementary Table 2. Percentage of down regulated genes ( $p < 0.01$ ) by microarray**

|                            | Chr 21 | whole genome |
|----------------------------|--------|--------------|
| Disomic/Trisomic           | 93.5   | 42.2         |
| Parental line (DOX/no DOX) | 41.0   | 36.6         |
| Clone 1 (DOX/no DOX)       | 96.3   | 51.2         |
| Clone 2 (DOX/no DOX)       | 94.5   | 49.4         |
| Clone 3 (DOX/no DOX)       | 98.1   | 49.5         |

**Supplementary Table 2.** Of genes with significant change in expression ( $p < 0.01$ ), ~95% were repressed on Chr21, with balanced (~50%) changes (up and down) on other chromosomes in three transgenic clones. Repression in dox-treated clones reflects repression seen if the third Chr21 was lost (Disomic/Trisomic).

**Supplementary Table 3. Primers for Chr21 gene amplification (allele-specific SNP silencing analysis)**

| genes          | Forward primer                   | reverse primer                   |
|----------------|----------------------------------|----------------------------------|
| <i>ADAMTS1</i> | 5' - TCTCTGAAACCATAGCAGCCA -3'   | 5' - CTTGTGCAGACCATCCCTGC -3'    |
| <i>ETS2</i>    | 5' - GCCTTTTGCAACCAGGAACAGC -3'  | 5' - ATCACACAGAAGAACGTGGAGC -3'  |
| <i>SPA13</i>   | 5' - AACTCTGCTCCAAATGCCGA -3'    | 5' - CCTGTACATCATTCTCTGCTTGG -3' |
| <i>TIAM1</i>   | 5' - TGGGGTGATTTGCTTTCCAGTGC -3' | 5' - GTGCAGTGTCTGCCCAAGC -3'     |

**Supplementary Table 4 Primers for qRT-PCR**

| genes          | Forward primer                   | reverse primer                   |
|----------------|----------------------------------|----------------------------------|
| <i>CXADR</i>   | 5' - TCGGTCTAAACGTTGTCCCT - 3'   | 5' - AGTGGACGTACGGCTCTTTG - 3'   |
| <i>COL6A1</i>  | 5' - ATCAGCCAGACCATCGACAC - 3'   | 5' - GCCCTTCTCTCCCTTGTAGC - 3'   |
| <i>PTTG1IP</i> | 5' - GTTGGGTGAACTTTGAGGCG - 3'   | 5' - GTGCTGGAGCGCTTTAGTTG - 3'   |
| <i>ADAMTS1</i> | 5' - CCCTCACTCTGCGGAACTTTT - 3'  | 5' - ATTAAGGCTGGCACACTGCTT - 3'  |
| <i>BTG3</i>    | 5' - CCCATGTGAGGTGTGCTGT - 3'    | 5' - AGGGCCCTGGTAACTTTCCT - 3'   |
| <i>TIAM1</i>   | 5' - TCAAAACCGAGAGCCTTCCC - 3'   | 5' - CGGAGACGGCATCAGAATCA - 3'   |
| <i>USP16</i>   | 5' - AGCCTTCAGTTTGGCTGTGT - 3'   | 5' - GGCTTTGGAGTTGTAATGCTGG - 3' |
| <i>APP</i>     | 5' - GGAGCGCTCTCGACTTTTCT - 3'   | 5' - TGTGCATGTTTCAGTCTGCCA - 3'  |
| <i>β-ACTIN</i> | 5' - TTGCCGACAGGATGCAGAAGGA - 3' | 5' - AGGTGGACAGCGAGGCCAGGAT - 3' |
